# Supplementary material
Source: HighWire-hosted journal article supplement (https://erj.ersjournals.com/content/55/4/1902027)
Supplement: inline-supplementary-material-1 [file inline-supplementary-material-1.pdf]

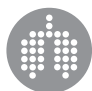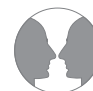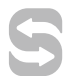

SHAREABLE PDF

# C1-esterase inhibitor treatment for antibody-mediated rejection after lung transplantation: two case reports

François Parquin<sup>1</sup>, Elise Cuquemelle<sup>1</sup>, Eve Camps<sup>2</sup>, Jérôme Devaquet<sup>3</sup>, Mathilde Phillips Houllbracq<sup>3</sup>, Edouard Sage<sup>4,5</sup>, Olivier Brugière<sup>6</sup>, Morgan Le Guen<sup>5,7</sup>, Elisabeth Longchamp<sup>8</sup>, Stéphanie Malard<sup>9</sup>, Clément Picard<sup>7</sup>, Jean Luc Taupin<sup>9</sup> and Antoine Roux<sup>5,6</sup>, the FOCH Lung Transplant group

**Affiliations:** <sup>1</sup>Thoracic Intensive Care Unit, Foch Hospital, Suresnes, France. <sup>2</sup>Pharmacy Dept, Foch Hospital, Suresnes, France. <sup>3</sup>Intensive Care Unit, Foch Hospital, Suresnes, France. <sup>4</sup>Thoracic Surgery Dept, Foch Hospital, Suresnes, France. <sup>5</sup>Université Versailles-Saint-Quentin-en-Yvelines, Versailles, France. <sup>6</sup>Pneumology, Adult Cystic Fibrosis Center and Lung Transplantation Dept, Foch Hospital, Suresnes, France. <sup>7</sup>Anesthesiology Dept, Foch Hospital, Suresnes, France. <sup>8</sup>Pathology Dept, Foch Hospital, Suresnes, France. <sup>9</sup>Laboratoire Régional d'Histocompatibilité, Saint-Louis Hospital, Assistance Publique-Hôpitaux de Paris, Paris, France.

**Correspondence:** Antoine Roux, Hopital Foch, Pneumologie, 40 rue Worth, Suresnes, France. E-mail: a.roux@hopital-foch.org

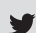

@ERSpublications

**C1 esterase inhibitor could be efficient in complement dependent antibody mediated rejection in lung transplant patients** <http://bit.ly/2Nsz6R4>

**Cite this article as:** Parquin F, Cuquemelle E, Camps E, *et al.* C1-esterase inhibitor treatment for antibody-mediated rejection after lung transplantation: two case reports. *Eur Respir J* 2020; 55: 1902027 [https://doi.org/10.1183/13993003.02027-2019].

This single-page version can be shared freely online.

## To the Editor:

Antibody-mediated rejection (AMR) after lung transplantation (LTx) is associated with poor prognosis [1]. Recent International Society for Heart and Lung Transplantation recommendations propose a standardised classification of lung AMR [2]. Based on the number of features present, this classification describes three different degree of certainty for AMR diagnosis. However, in the absence of a true gold standard, the management of potential AMR are subject to quite a high degree of uncertainty.
